1 **Natural selection on plasticity of thermal traits in a highly seasonal**  
2 **environment**

3

4 Leonardo D. Bacigalupe<sup>1\*</sup>, Aura M. Barria<sup>1</sup>, Avia Gonzalez-Mendez<sup>1</sup>, Manuel Ruiz-Aravena<sup>2</sup>

5 Juan D. Gaitan-Espitia<sup>3</sup>, Mark Trinder<sup>4</sup> and Barry Sinervo<sup>5\*</sup>

6

7 <sup>1</sup>Instituto de Ciencias Ambientales y Evolutivas, Facultad de Ciencias, Universidad Austral de  
8 Chile, Casilla 567, Valdivia, Chile

9

10 <sup>2</sup>School of Biological Sciences, Faculty of Sciences, Engineering & Technology, University of  
11 Tasmania, Hobart, Tasmania, Australia

12

13 <sup>3</sup>CSIRO Oceans and Atmosphere, GPO Box 1538, Hobart 7001, TAS, Australia

14

15 <sup>4</sup>MacArthur Green, 95 South Woodside Road, Glasgow, UK

16

17 <sup>5</sup>Department of Ecology and Evolutionary Biology, University of California, Santa Cruz, CA,  
18 95064, USA

19

20 \*Both authors contributed equally to this work

21 Correspondence should be addressed to L.D.B (+5663 2293567, [lbacigal@gmail.com](mailto:lbacigal@gmail.com))

22 **Abstract**

23 Although plasticity has been proposed as an escape from climate change, beyond certain limits  
24 genetic adjustments may be required to persist in a warming world. Evolutionary adaptation  
25 depends on the amount of additive genetic (co)variances and on the strength of phenotypic  
26 selection. However, in spite of its paramount importance to prevent demographic extinction, it is  
27 unknown whether selection in nature targets thermal acclimation capacity itself. We addressed  
28 such an important gap in our knowledge by measuring survival, through mark recapture  
29 integrated into an information-theoretic approach, as a function of the plasticity of critical  
30 thermal limits for activity, behavioral thermal preference and the thermal sensitivity of  
31 metabolism in the northernmost population of the four-eyed frog *Pleurodema thaul*. Overall, our  
32 results indicate that thermal acclimation is a target of selection in nature. In particular, we found  
33 that survival strongly increases with body size, although models with directional selection on  
34 trait plasticity showed support (ca. 25% of cumulative Akaike weights) and suggest a rather  
35 complex fitness landscape where different high-fitness strategies are being favoured. The models  
36 including correlational, directional and stabilizing selection for more than one trait had very  
37 weak empirical support. One strategy favoured frogs that are able to tolerate the high  
38 temperatures that occur during the cold breeding season whilst the other favoured frogs that  
39 increase their activity levels during the warmer periods of the year.

40

41 **Keywords:** Climate change, amphibians, natural selection, physiological plasticity, acclimation,  
42 *Pleurodema thaul*, Atacama Desert

## 43 **Introduction**

44           The biodiversity of the Earth is undergoing an extraordinary transformation as a result of  
45 the effects of human activities on every terrestrial ecosystem [1,2]. Although it is clear the  
46 impact of global change drivers will depend on the region, ecosystem and species, without a  
47 doubt, global warming is projected to be the largest human-induced disturbance placed on  
48 natural ecosystems [3,4]. In the face of warming, a population (or a species) has four possible  
49 compensatory mechanisms to prevent demographic extinction. Mobile species can track their  
50 current climate envelope given the structure of the landscape or they can regulate their body  
51 temperature behaviourally if the thermal environment is heterogeneous [5]. However, when  
52 dispersal and behavioural thermoregulation are not options, a population should adjust to a  
53 warming climate by physiological plasticity and/or evolutionary adaptation under the force of  
54 natural selection [6,7].

55           Although plasticity has been proposed as an escape from climate change, beyond certain  
56 limits genetic adjustments may be required to persist in a warming world [6]. Evolutionary  
57 adaptation depends on the amount of additive genetic (co)variances and on the strength of  
58 phenotypic selection [8–11]. Recently, Logan and collaborators [12], showed that when lizards  
59 are transplanted to a warmer and more thermally variable site, thus mimicking future climate  
60 change, natural selection favored individuals that run faster at warmer temperatures and across a  
61 broader range of temperatures. However, in spite of its paramount importance to prevent  
62 demographic extinction, it is unknown whether selection in nature targets thermal acclimation  
63 capacity itself. We addressed such an important gap in our knowledge by measuring survival,  
64 through mark recapture integrated into an information-theoretic approach, as a function of the  
65 plasticity of four thermal key traits in the northernmost population of the four-eyed frog

66 *Pleurodema thaul*. At the limit of its distribution and inhabiting two small ponds in the oasis  
67 Carrera Pinto in the hyperarid Atacama Desert, this population does not have any dispersal  
68 opportunities. Furthermore, residing in such a thermally variable environment on both daily and  
69 seasonal basis, this population will have to face warming either by physiological plasticity,  
70 evolutionary adaptation or both. We have recently shown that this population will be able to  
71 endure the worst projected scenario of climate warming as it has not only the plasticity [13] but  
72 also the environmental opportunities to regulate its body temperature behaviourally [14].  
73 However, we still do not know whether that physiological plasticity, which results from  
74 inhabiting a highly variable environment, is being targeted by natural selection. Therefore, we  
75 measured for the first time natural selection on plastic responses of thermal critical temperatures  
76 ( $CT_{Max}$  and  $CT_{Min}$ ), preferred temperature ( $T_{Pref}$ ) and thermal sensitivity of metabolism ( $Q_{10}$ )  
77 after acclimation to 10°C and 20°C. We tested three predictions regarding phenotypic selection  
78 and plasticity (i.e.  $Trait_{20°C} - Trait_{10°C}$ ) that built up from previous findings showing that  
79 acclimation to warmer temperatures produces an increase in the upper but not in the lower limits  
80 of the thermal performance curve [14]. First, there is positive directional selection for plasticity  
81 of  $CT_{Max}$  and  $T_{Pref}$  as well as correlational selection among them. Second, there is stabilising  
82 selection on  $CT_{Min}$  plasticity. As energy inputs are limited, the energetic definition of fitness  
83 indicates that individuals with higher maintenance costs (i.e. resting metabolic rate) would have  
84 less energy available to allocate to growth, reproduction and/or performance. The main prediction  
85 of this principle is that natural selection should maximize the residual available energy, and  
86 therefore, higher maintenance costs would be associated with lower fitness if no compensations  
87 in other functions were available [15,16]. Thus, our third prediction is that there is stabilising  
88 selection on  $Q_{10}$  plasticity.

## 89 **METHODS**

### 90 *Study organism and laboratory maintenance*

91           Eighty-three adults individuals of *P. thaul* were captured during September 2012 on two  
92 small ponds at Carrera Pinto (27°06'40.2'' S, 69°53'44.3'' W), a small oasis in the Atacama  
93 Desert that is known to be the northernmost population of the species [17]. In both ponds, we  
94 performed an exhaustive search across microhabitats (below rocks, in the vegetation and in the  
95 water). All individuals were transported to the laboratory (Universidad Austral de Chile,  
96 Valdivia) within 2 – 3 days of capture. Following capture all animals were marked by toe  
97 clipping and maintained in the laboratory for one month at a temperature of  $20^{\circ} \pm 2^{\circ}\text{C}$  and with a  
98 photoperiod 12D:12L. Animals were housed (N = 5) in terrariums (length x width x height: 40 x  
99 20 x 20 cm) provided with a cover of moss and vegetation and a small recipient filled with water.  
100 Individuals were fed once a week with mealworms (*Tenebrio sp.* larvae) and Mazuri® gel diets.

101

### 102 *Acclimation and thermal traits*

103           After one month at maintenance conditions, in a split cross design frogs were acclimated  
104 to either 10°C or 20°C for two weeks before measuring thermal traits. Frogs were randomly  
105 assigned to the first acclimation temperature using a coin. Next they were acclimated to the other  
106 temperature and again measured thermal traits. We chose these acclimation temperatures because  
107 they are close to the mean minimum temperatures during the breeding season (August - October,  
108 10°C) and to the mean temperatures during the active period of the species (20°C) at Carrera  
109 Pinto ([www.cr2.cl](http://www.cr2.cl)). None of the investigators were blinded to the group allocation during the  
110 experiments.

111 Critical temperatures were determined as the environmental temperature at which an  
112 individual was unable to achieve an upright position within 1 minute [14]. Each individual was  
113 placed in a small chamber inside a thermo-regulated bath (WRC-P8, Daihan, Korea) at 30°C  
114 ( $CT_{Max}$ ) and 5°C ( $CT_{Min}$ ) for 15 minutes, after which the bath temperature was increased (or  
115 decreased) at a rate of 0.8°C per minute [18]. Every minute or at every change in 1°C, the  
116 chamber was turned upside down and we observed if the animal was able to return to the upright  
117 position. When an animal was unable to achieve an upright position within 1 minute it was  
118 allowed to recover at ambient temperature ( $CT_{Min}$ ) or for 30 minutes in a box with ice packs  
119 ( $CT_{Max}$ ). Body mass (a proxy of body size) was obtained before each trial using a Shimadzu  
120 TX323L electronic balance.

121 Preferred temperature ( $T_{Pref}$ ) was determined simultaneously for five individuals in five  
122 open-top terraria (length x width x height: 85 x 12 x 30 cm). Each terrarium had a thermal  
123 gradient between 10°C and 30°C produced by an infrared lamp overhead (250 W) on one end,  
124 and ice packs on the other. The organic gardening soil was moisturized at the beginning of each  
125 trial to prevent the desiccation of the frogs. Five individuals were placed at the centre of each one  
126 of the terraria and 45 minutes later we registered  $T_{Pref}$  as the dorsal body temperature ( $T_b$ ) using a  
127 UEi INF155 Scout1 infrared thermometer. Dorsal and cloacal  $T_b$  are highly associated ( $r_P =$   
128 0.99) [see ,14 for details on the calibration procedure]. Body mass was obtained before each trial  
129 using a Shimadzu TX323L electronic balance.

130 Standard metabolic rate, measured through oxygen consumption at 20°C and 30°C was  
131 measured continuously using an infrared O<sub>2</sub> - CO<sub>2</sub> analyzer (LI-COR LI6262, Lincoln, NV,  
132 USA). The analyzer was calibrated periodically against a precision gas mixture. Although there  
133 was almost no difference between calibrations, baseline measurements were performed before

134 and after each recording. Flow rates of CO<sub>2</sub> – free air was maintained at 100 ml min<sup>-1</sup> ± 1% by a  
135 Sierra mass flow controller (Henderson, NV, USA). We used cylindrical metabolic chambers (60  
136 ml), covered by metal paper. O<sub>2</sub> consumption was recorded during 45 minutes per individual.  
137 Each record was automatically transformed by a macro program recorded in the ExpeData  
138 software (Sable Systems), to (1) transform the measure from % to mlO<sub>2</sub> min<sup>-1</sup>, taking into  
139 account the flow rate and (2) to eliminate the first 5 min of recordings. For each individual, the  
140 metabolic sensitivity (Q<sub>10</sub>) was calculated as the ratio between metabolic rate measured at 30°C  
141 and metabolic rate measured at 20°C.

142

### 143 *Selection on thermal traits*

144 After experiments, all frogs were put back to 20°C for at least one month before releasing  
145 them. Marked frogs were released at Carrera Pinto in April 2013 and their survival was  
146 monitored on three separate recapture efforts (13<sup>th</sup> October 2013, 13<sup>th</sup> June and 9<sup>th</sup> September  
147 2014). For each individual, we express plasticity as the difference in trait values between high  
148 versus low acclimation temperatures ( $\Delta\text{Trait} = \text{Trait}_{20^{\circ}\text{C}} - \text{Trait}_{10^{\circ}\text{C}}$ ), hereafter referred to as  
149  $\Delta\text{CT}_{\text{Max}}$ ,  $\Delta\text{CT}_{\text{Min}}$ ,  $\Delta\text{T}_{\text{Pref}}$ , and  $\Delta\text{Q}_{10}$ . As the desert surrounds these two small ponds dispersal was  
150 not a concern.

151 The relationship between trait plasticity and survival was analyzed using a Cormack-  
152 Jolly-Seber (CJS) framework in Program MARK. An overall goodness of fit test was run using  
153 U-Care to check for the presence of structure in the data which could be accommodated within  
154 the modeled parameters and to obtain a value for the over dispersion parameter ( $\hat{c}$ ). The time  
155 interval between capture occasions (as a fraction of 1 year and considering also the original  
156 capture event) was included in the analysis to accommodate the unequal intervals. The resulting

157 resighting and survival estimates were therefore corrected to annual estimates. Survival and  
158 resighting parameters were obtained in a two-stage process. First, the best-fit resighting model  
159 was identified from three candidate models (constant, time dependent and a linear trend). The fit  
160 of the three candidate resighting models was compared using survival modeled as both a constant  
161 rate and also as a time-dependent rate, to ensure that selection of the best-fit resighting model  
162 was not influenced by choice of survival model. Once the best-fit resighting model had been  
163 identified (using AICc) this was then retained for all candidate survival models. Survival rates  
164 were extracted as a function of the individual covariates. A model selection and an information-  
165 theoretic approach [19] was employed to contrast the adequacy of different working hypotheses  
166 (the candidate models) of selection on trait plasticity. To reduce the number of candidate models,  
167 thereby minimizing the likelihood of spurious results [19,20], we tested only for a null model, a  
168 model with body mass and models with directional and quadratic selection for each trait  
169 separately and also for correlational selection (interaction of trait combinations) among traits  
170 (Table 1). In total, 27 models were evaluated. Body mass was included in all models including  
171 physiological traits. All analyses were performed in R version 3.1.3 employing package RMark  
172 [21]. No transformation was required to meet assumptions of statistical tests.

173

## 174 **RESULTS**

175 All measured traits including critical thermal limits ( $CT_{Max}$ ,  $CT_{Min}$ ), thermal preference ( $T_{Pref}$ )  
176 and sensitivity of metabolic rate to temperature ( $Q_{10}$ ) and their norms of reaction for acclimation  
177 plasticity ( $\Delta CT_{Max}$ ,  $\Delta CT_{Min}$ ,  $\Delta T_{Pref}$ ,  $\Delta Q_{10}$ ) showed high variance among individuals (Fig. 1). In  
178 addition, for all traits some individuals shifted their thermal traits to higher values when  
179 acclimated to high temperatures, but other individuals showed the reverse response, that is their



180 traits shifted to lower values after acclimation at higher temperatures (Fig. 2). Body size showed  
181 a positive relationship with  $\Delta CT_{Max}$  ( $b = 0.59 \pm 0.18$  SE,  $F_{1,86} = 10.99$ ,  $P = 0.0013$ ) which  
182 indicates that larger individuals had positive delta values of  $CT_{Max}$  (i.e. the values at 20°C were  
183 higher than at 10°C). Body size was not associated with any other trait plasticity (results not  
184 shown).

185         The overall goodness of fit measure for the CJS model indicated a moderate level of  
186 over-dispersion ( $c\text{-hat} = 2.65$ ,  $P = 0.103$ ), however with only 3 recapture occasions it was not  
187 possible to identify an alternative starting model and the basic CJS model was adopted as the  
188 basis for subsequent model fitting, with unexplained over-dispersion controlled using the  $c\text{-hat}$   
189 adjustment. A constant resighting rate was the best-fit model irrespective of whether survival  
190 was modeled as a constant or time dependent rate (Table 1). Consequently, the constant rate-  
191 resighting model was retained for subsequent modeling of survival. The model selection  
192 procedure indicated that from the 27 candidate models tested, there was not a single best-fit one.  
193 In particular, the null model and the one containing only body size had a relative strong support  
194 (ca. 60% of cumulative Akaike weights), whilst a remaining 35% was split among models  
195 including simple directional selection (ca. 26% of cumulative Akaike weights) and those  
196 including directional and non-linear selection on the plasticity of each trait (ca. 9%, Table 1).  
197 The models including correlational, directional and stabilizing selection for more than one trait  
198 had very weak empirical support (Table 1). Strong support for the simpler models may in part  
199 have been due to the relatively high value of  $c\text{-hat}$ , which penalizes models on the basis of  
200 parameter number. Survival in relation to each covariate was obtained as the model averaged  
201 value across all candidate models (Table 1), weighted by individual model probability. In

202 particular, survival increased with body mass,  $\Delta CT_{\text{Min}}$  and  $\Delta Q_{10}$  and decreased with  $\Delta CT_{\text{Max}}$  and  
203  $\Delta T_{\text{Pref}}$  (Fig. 3).

204

## 205 **DISCUSSION**

206 To persist in a warming world evolutionary adaptation might be required when  
207 acclimatisation responses reach their limit [6]. As both the strength and shape of selection are  
208 key elements that impact the speed at which populations can evolve, determining whether  
209 selection in nature targets plasticity itself is of paramount importance. Here, to the best of our  
210 knowledge for the first time, we studied natural selection on thermal acclimation capacity of  
211 performance ( $\Delta CT_{\text{Max}}$  and  $\Delta CT_{\text{Min}}$ ), metabolism ( $\Delta Q_{10}$ ) and behaviour ( $\Delta T_{\text{Pref}}$ ). Our results  
212 indicate that thermal acclimation is a target of selection in nature, although the pattern of  
213 phenotypic selection evidences a complex fitness landscape where different high-fitness  
214 strategies are being favoured. Summarising, we found that survival increased in individuals: (i)  
215 with larger body size, (ii) with higher  $CT_{\text{Max}}$  when cold acclimated, (iii) with higher  $CT_{\text{Min}}$  when  
216 warm acclimated, (iv) that selected higher temperatures ( $T_{\text{Pref}}$ ) when cold acclimated and (v) that  
217 increase their  $Q_{10}$  when warm acclimated.

218 Acclimation, particularly from the point of view of environmental or comparative  
219 physiologists, has long been thought to be adaptive (usually *post hoc*), although that claim  
220 clearly does not represent a test for it [22]. However, most of the empirical tests of this beneficial  
221 acclimation hypothesis (i.e. BAH, acclimation to a higher temperature should enhance  
222 performance at those temperatures) have offered little support for it [22,23]. In fact, it has been  
223 shown that physiological traits can evidence a wide repertoire of responses to acclimation  
224 [23,24]. Here we show an adaptive benefit of the BAH in terms of improved survival for  $CT_{\text{Min}}$

225 and  $Q_{10}$ . In addition,  $CT_{Max}$  and  $T_{Pref}$  show that acclimation to a low temperature enhances  
226 performance at those low temperature, which is known as the cold is better with complete  
227 temperature compensation hypothesis [23]. Furthermore, although we did not use an  
228 experimental framework to isolate a particular agent of selection [12,25], we consider that our  
229 results strongly suggest that the thermal environment is responsible for the patterns we found.  
230 First, this population inhabits two highly isolated ponds were the presence of other potentials  
231 competitors (anurans) has not been observed, although there might be a risk of predation by  
232 herons (*L.D.B. personal observation*). Second, survival was monitored during a complete year on  
233 three separate recapture efforts encompassing specific phases related to the breeding season  
234 (August – October). After measurements, animals were released in April 2013 (non-breeding),  
235 the first recapture occurred at the end of that breeding season (October 2013), the second  
236 occurred almost at the onset (mid-June 2014) and during the following breeding season  
237 (September 2014). In this context, although our survival estimates have been averaged out  
238 through that year (see Methods), they incorporate that within year variation associated with  
239 clearly different thermal regimens during the breeding season and the active period. Third, using  
240 biophysical models at Carrera Pinto, we have determined that mean operative temperature during  
241 daytime was only affected by sun exposure (shade – sunshine) but not by hydric (dry – wet)  
242 conditions [14].

243        Selection favored bigger individuals, something that have been previously reported in the  
244 literature [26–29]. This is somewhat unsurprising, given that body mass is known to be  
245 positively associated with several physiological traits that enhance performance [30–34]  
246 including plasticity itself [35]. Furthermore, bigger individuals showed positive delta values of  
247  $CT_{Max}$ , that is their  $CT_{Max}$  increased when warm acclimated. This might seem puzzling as we

248 also shown that survival increased in individuals with higher  $CT_{Max}$  when cold acclimated (i.e.  
249 the opposite pattern in directional selection on  $\Delta CT_{Max}$ ). We believe these two different high-  
250 fitness strategies are probably related to *Pleurodema thaul*'s natural history. These frogs are  
251 active and aboveground 365 days a year, only retreating to the pond to breed, cool off, or to  
252 hydrate. They breed during August – October where they experience an average minimum  
253 temperature of 10°C but where temperatures reach an average maximum of 25°C. In addition  
254 during the breeding season temperatures have been recorded to fluctuate from below 0°C  
255 (minimum -6.2°C) up to above 30°C (maximum 37.5°C) (1993 – 2014; [www.cr2.cl](http://www.cr2.cl)). The non-  
256 breeding season (November – July) has higher averages of minimum and maximum  
257 temperatures, but less extreme records of minimum temperatures. In this context, one strategy  
258 exhibits increased survival in individuals that are able to tolerate high temperatures during the  
259 breeding season. That is, they showed higher  $CT_{Max}$  and  $T_{Pref}$  when cold acclimated (Fig. 3).  
260 However, the higher tolerance to high temperatures when cold acclimated, came at a cost of  
261 lower tolerance to cold temperatures in that cold season (i.e. higher  $CT_{Min}$ , Fig. 3). The  
262 alternative strategy exhibits higher survival in individuals that, when warm acclimated (i.e. 20°C  
263 mean temperature during the whole year), increase their  $Q_{10}$  and reduce their investment in cold  
264 tolerance mechanisms. In addition, it might be possible that bigger individuals, who also have  
265 higher values of  $CT_{Max}$ , are able to tolerate better the high temperatures during the non-breeding  
266 months. Nevertheless, further work is needed to evaluate whether selection operates differently  
267 on and off the breeding period for body size.

268         The difference between habitat temperature and  $CT_{Max}$  is thought of as an index warming  
269 tolerance [36,37]. Here we construct an analogous metric between  $T_{pref}$  and  $CT_{Max}$  as a thermal  
270 safety margin. A frog that has a large difference between its thermal preference and  $CT_{Max}$  will

271 maintain a larger safety margin than one with a small difference. We computed plasticity in the  
272 thermal safety margin under acclimation,  $\Delta[CT_{Max} - T_{Pref}]$ , and correlated it with  $\Delta Q_{10}$  for  
273 metabolism ( $b = -0.00256 \pm 0.00124$  S.E.,  $F_{1,82} = 4.26$ ,  $P = 0.04$ ), controlling for effects of frogs  
274 with higher growth plasticity that also have higher  $Q_{10}$  plasticity ( $b = 0.0705 \pm 0.0295$  S.E.,  $F_{1,82} =$   
275  $5.71$ ,  $P = 0.02$ ). That is, frogs with a positive value for  $\Delta Q_{10}$  (and also higher survival when warm  
276 acclimated) have negative values for  $\Delta[CT_{Max} - T_{Pref}]$  and thus, lose some of their safety margin  
277 during acclimation. Therefore, the high plasticity in  $Q_{10}$  involves a change in preference that  
278 brings the body temperatures of thermoregulating frogs closer to  $CT_{Max}$  when they move from  
279 lower to higher temperatures. In addition, frogs that increased their  $T_{Pref}$  when warm acclimated  
280 showed a decrease in survival (Fig. 3) suggesting that the gains in metabolic capacity when  
281 warm acclimated might be offset by the costs of being active at higher temperatures.  
282 Summarizing, one strategy favored frogs that are able to tolerate the high temperatures that occur  
283 during the cold breeding season whilst the other favored frogs that increase their activity levels  
284 during the warmer periods of the year.

285 It is important to mention though, that we have measured plasticity in just one life stage.  
286 It is likely that other ecological and physiological traits might also be plastic, their responses to  
287 acclimation might be different and they might even be different between different life stages and  
288 thus, only further work in other traits and stages might disentangle these possibilities.  
289 Nevertheless, we still consider our results show a strong signal and provide the first evidence of  
290 phenotypic plasticity as an actual target of selection in nature, and therefore to evaluate the  
291 potential of evolutionary adaptation to prevent demographic extinction from climate change [38].

292

293

294 **Acknowledgements.** We thank Ray Huey and Michael Logan for highly valuable comments on  
295 a previous version on the manuscript.

296

297 **Competing interests.** We declare we have no competing interests

298

299 **Author Contributions.** L.D.B conceptualized the study, designed the experimental procedures  
300 and carried out the experiment with A.M.B., A.G.M., M.R.A. and J.D.G.E; B.S., M.T. and L.D.  
301 B. analyzed the data and L.D.B. and B.S. wrote the paper with input from A.M.B and J.D.G.E.

302

303 **Funding.** Leonardo Bacigalupe acknowledges funding from FONDECYT grant 1150029. Barry  
304 Sinervo was supported by a Macrosystems grant (EF-1241848) from NSF. Aura Barria and  
305 Manuel Ruiz-Aravena were supported by a CONICYT Doctoral Fellowship.

306

307 **Ethics.** This study did not involve endangered or protected species and was carried out in strict  
308 accordance with the recommendations in the Guide for the Care and Use of Laboratory Animals  
309 of the Comisión Nacional de Investigación Científica y Tecnológica de Chile (CONICYT). All  
310 experiments were conducted according to current Chilean law. The protocol was approved by the  
311 Committee on the Ethics of Animal Experiments of the Universidad Austral de Chile.

312

313

314 **References**

- 315 1 Vitousek, P. M. 1992 Global Environmental Change: An Introduction. *Annu. Rev. Ecol.*  
316 *Syst.* **23**, 1–14.
- 317 2 Vitousek, P. M. 1994 Beyond global warming: Ecology and global change. *Ecology* **75**,  
318 1861–1876.
- 319 3 Pereira, H. M. et al. 2010 Scenarios for global biodiversity in the 21st century. *Science*  
320 *(80- )*. **330**, 1496–1501. (doi:10.1126/science.1196624)
- 321 4 Beaumont, L. J., Pitman, A., Perkins, S., Zimmermann, N. E. & Yoccoz, N. G. 2011  
322 Impacts of climate change on the world ’s most exceptional ecoregions. *Proc. Natl. Acad.*  
323 *Sci. U. S. A.* **108**, 2306–2311. (doi:10.1073/pnas.1007217108/-  
324 /DCSupplemental.www.pnas.org/cgi/doi/10.1073/pnas.1007217108)
- 325 5 Kearney, M., Shine, R. & Porter, W. P. 2009 The potential for behavioral  
326 thermoregulation to buffer ‘cold-blooded’ animals against climate warming. *Proc. Natl.*  
327 *Acad. Sci. U. S. A.* **106**, 3835–3840. (doi:10.1073/pnas.0808913106)
- 328 6 Huey, R. B., Kearney, M. R., Krockenberger, A., Holtum, J. A. M., Jess, M. & Williams,  
329 S. E. 2012 Predicting organismal vulnerability to climate warming: roles of behaviour,  
330 physiology and adaptation. *Philos. Trans. R. Soc. B Biol. Sci.* **367**, 1665–1679.  
331 (doi:10.1098/rstb.2012.0005)
- 332 7 Seebacher, F., White, C. R. & Franklin, C. E. 2014 Physiological plasticity increases  
333 resilience of ectothermic animals to climate change. *Nat. Clim. Chang.* **5**, 61–66.  
334 (doi:10.1038/nclimate2457)
- 335 8 Bacigalupe, L. D. 2008 Biological invasions and phenotypic evolution: a quantitative  
336 genetic perspective. *Biol. Invasions* **11**, 2243–2250. (doi:10.1007/s10530-008-9411-2)

- 337 9 Bacigalupe, L. D., Barrientos, K., Beckerman, A. P., Carter, M. J., Figueroa, C. C., Foster,  
338 S. P., Moore, A. J., Silva, A. X. & Nespolo, R. F. 2013 Can invasions occur without  
339 change? A comparison of G-matrices and selection in the peach-potato aphid, *Myzus*  
340 *persicae*. *Ecol. Evol.* **3**, 5109–5118. (doi:10.1002/ece3.883)
- 341 10 Nespolo, R. F., Bartheld, J. L., González, A., Bruning, A., Roff, D. A., Bacigalupe, L. D.  
342 & Gaitán-Espitia, J. D. 2014 The quantitative genetics of physiological and morphological  
343 traits in an invasive terrestrial snail: additive vs. non-additive genetic variation. *Funct.*  
344 *Ecol.* **28**, 682–692. (doi:10.1111/1365-2435.12203)
- 345 11 Gaitán-Espitia, J. D., Marshall, D. J., Dupont, S., Bacigalupe, L. D., Bodrossy, L. &  
346 Hobday, A. J. 2017 Geographical gradients in selection can reveal genetic constraints for  
347 evolutionary responses to ocean acidification. *Biol. Lett.* **13**, 20160784.  
348 (doi:10.1098/rsbl.2016.0784)
- 349 12 Logan, M. L., Cox, R. M. & Calsbeek, R. 2014 Natural selection on thermal performance  
350 in a novel thermal environment. *Proc. Natl. Acad. Sci. U. S. A.* , 1–5.  
351 (doi:10.1073/pnas.1404885111)
- 352 13 Barria, A. M. & Bacigalupe, L. D. 2017 Intraspecific geographic variation in thermal  
353 limits and acclimatory capacity in a wide distributed endemic frog. *J. Therm. Biol.* **69**,  
354 254–260. (doi:10.1016/j.jtherbio.2017.08.010)
- 355 14 Ruiz-Aravena, M., Gonzalez-Mendez, A., Estay, S. A., Gaitán-Espitia, J. D., Barria-  
356 Oyarzo, I., Bartheld, J. L. & Bacigalupe, L. D. 2014 Impact of global warming at the  
357 range margins: phenotypic plasticity and behavioral thermoregulation will buffer an  
358 endemic amphibian. *Ecol. Evol.* **4**, 4467–4475. (doi:10.1002/ece3.1315)
- 359 15 Bacigalupe, L. D. & Bozinovic, F. 2002 Design, limitations and sustained metabolic rate:



- 360 lessons from small mammals. *J. Exp. Biol.* **205**, 2963–2970.
- 361 16 Artacho, P. & Nespolo, R. F. 2009 Natural selection reduces energy metabolism in the  
362 garden snail, *Helix aspersa* (*Cornu aspersum*). *Evolution (N. Y.)*. **63**, 1044–50.  
363 (doi:10.1111/j.1558-5646.2008.00603.x)
- 364 17 Correa, C., Sallaberry, M., Gonzalez, B., Soto, E. & Mendez, M. 2007 Amphibia, Anura,  
365 Leiuperidae, *Pleurodema thaul*: Latitudinal and altitudinal distribution extension in Chile.  
366 *Check List* **3**, 267–270.
- 367 18 Rezende, E. L., Tejedo, M. & Santos, M. 2011 Estimating the adaptive potential of critical  
368 thermal limits: methodological problems and evolutionary implications. *Funct. Ecol.* **25**,  
369 111–121. (doi:10.1111/j.1365-2435.2010.01778.x)
- 370 19 Burnham, K. P. & Anderson, D. R. 2003 *Model selection and multimodel inference: a*  
371 *practical information-theoretic approach*. Springer Science & Business Media.
- 372 20 Lukacs, P., Burnham, K. & Anderson, D. 2010 Model selection bias and Freedman’s  
373 paradox. *Ann. Inst. Stat. Math.* **62**, 117–125.
- 374 21 Laake, J. 2013 RMark: an R interface for analysis of capture–recapture data with MARK.  
375 In *AFSC Processed Rep 2013-01*, pp. 25. Seattle, Washington, USA.: Alaska Fisheries  
376 Science Center, NOAA, National Marine Fisheries Service.
- 377 22 Huey, R. B. & Berrigan, D. 1996 Testing evolutionary hypotheses of acclimation. In  
378 *Phenotypic and evolutionary adaptation to temperature* (eds A. Johnston & A. Bennett),  
379 pp. 205–237. Cambridge University Press.
- 380 23 Deere, J. A. & Chown, S. L. 2006 Testing the beneficial acclimation hypothesis and its  
381 alternatives for locomotor performance. *Am. Nat.* **168**, 630–44. (doi:10.1086/508026)
- 382 24 Huey, R. B., Berrigan, D. & Gilchrist, G. W. 1999 Testing the adaptive significance of

- 383 acclimation: a strong inference approach. *Am. Zool.* **39**, 323–336.  
384 (doi:10.1093/icb/39.2.323)
- 385 25 MacColl, A. D. C. 2011 The ecological causes of evolution. *Trends Ecol. Evol.* **26**, 514–  
386 522. (doi:10.1016/j.tree.2011.06.009)
- 387 26 Aubin-Horth, N., Ryan, D. A. J., Good, S. P. & Dodson, J. J. 2005 Balancing selection on  
388 size: Effects on the incidence of an alternative reproductive tactic. *Evol. Ecol. Res.* **7**,  
389 1171–1182.
- 390 27 Iida, H. & Fujisaki, K. 2007 Seasonal changes in resource allocation within an individual  
391 offspring of the wolf spider, *Pardosa pseudoannulata* (Araneae: Lycosidae). *Physiol.*  
392 *Entomol.* **32**, 81–86. (doi:10.1111/j.1365-3032.2006.00545.x)
- 393 28 Crosby, K. & Latta, R. G. 2013 A test of the reproductive economy hypothesis in plants:  
394 More offspring per capita come from large (not small) parents in *Avena barbata*. *Evol.*  
395 *Ecol.* **27**, 193–203. (doi:10.1007/s10682-012-9573-3)
- 396 29 Delaney, D. M. & Warner, D. A. 2017 Effects of age- and sex-specific density on  
397 behaviour and survival in a territorial lizard (*Anolis sagrei*). *Anim. Behav.* **129**, 31–41.  
398 (doi:10.1016/j.anbehav.2017.04.014)
- 399 30 Castellano, S., Rosso, A., Doglio, S. & Giacoma, C. 1999 Body size and calling variation  
400 in the green toad (*Bufo viridis*). *J. Zool.* **248**, 83–90. (doi:10.1111/j.1469-  
401 7998.1999.tb01025.x)
- 402 31 Madsen, T. & Shine, R. 2000 Energy versus risk: costs of reproduction in free-ranging  
403 pythons in tropical Australia. *Austral Ecol.* **25**, 670–675. (doi:Doi 10.1046/J.1442-  
404 9993.2000.01067.X)
- 405 32 Hurlbert, A. H., Ballantyne IV, F. & Powell, S. 2008 Shaking a leg and hot to trot: The

- 406 effects of body size and temperature on running speed in ants. *Ecol. Entomol.* **33**, 144–  
407 154. (doi:10.1111/j.1365-2311.2007.00962.x)
- 408 33 Shepherd, B. L., Prange, H. D. & Moczek, A. P. 2008 Some like it hot: Body and weapon  
409 size affect thermoregulation in horned beetles. *J. Insect Physiol.* **54**, 604–611.  
410 (doi:10.1016/j.jinsphys.2007.12.007)
- 411 34 Luna, F., Antenucci, C. D. & Bozinovic, F. 2009 Comparative energetics of the  
412 subterranean *Ctenomys* rodents: breaking patterns. *Physiol. Biochem. Zool.* **82**, 226–35.  
413 (doi:10.1086/597526)
- 414 35 Whitman, D. & Ananthakrishnan, T. 2009 *Phenotypic Plasticity of Insects: Mechanisms  
415 and Consequences*. Enfield: Science Publishers.
- 416 36 Deutsch, C. A., Tewksbury, J. J., Huey, R. B., Sheldon, K. S., Ghalambor, C. K., Haak, D.  
417 C. & Martin, P. R. 2008 Impacts of climate warming on terrestrial ectotherms across  
418 latitude. *Proc. Natl. Acad. Sci.* **105**, 6668–6672. (doi:10.1073/pnas.0709472105)
- 419 37 Sunday, J. M., Bates, a. E., Kearney, M. R., Colwell, R. K., Dulvy, N. K., Longino, J. T.  
420 & Huey, R. B. 2014 Thermal-safety margins and the necessity of thermoregulatory  
421 behavior across latitude and elevation. *Proc. Natl. Acad. Sci.* , 201316145.  
422 (doi:10.1073/pnas.1316145111)
- 423 38 Sinervo, B. et al. 2010 Erosion of Lizard Diversity by Climate Change and Altered  
424 Thermal Niches. *Science* **328**, 894–899.  
425  
426

427 **Figure Legends**

428 **Figure 1:** Frequency distribution of  $CT_{Min}$ ,  $T_{Pref}$  and  $CT_{Max}$  of the four-eyed frog when  
429 acclimated to 10°C and 20°C.

430

431 **Figure 2:** Individual plasticity in  $CT_{Min}$ ,  $T_{Pref}$ ,  $CT_{Max}$  and  $Q_{10}$  to 10 and 20°C acclimation  
432 treatments. Each line represents the individual value of the specific traits at each temperature.  
433 For  $CT_{Min}$  and  $CT_{Max}$  the width of the line is directly proportional to the number of individuals  
434 that showed that specific response.

435

436 **Figure 3:** Survival estimates of directional selection as a function of individual plasticity,  
437 expressed as  $\Delta$  (i.e.  $Trait_{20^{\circ}C} - Trait_{10^{\circ}C}$ ).

438

439

440

441

442

443

444

445

446

447

448

449

450 **Figure 1**

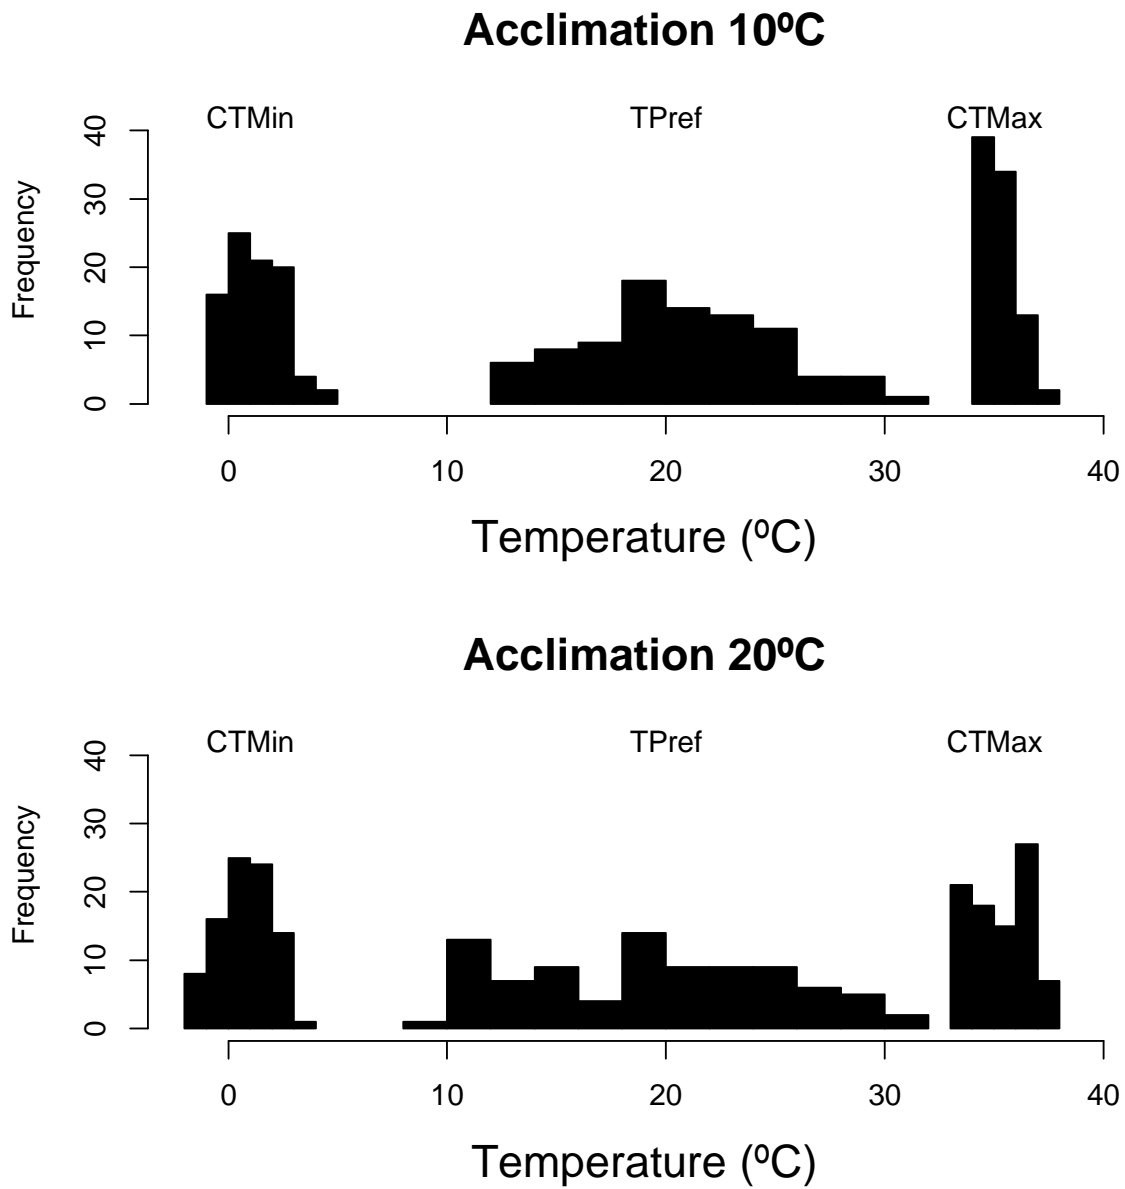

451

452

453 **Figure 2**

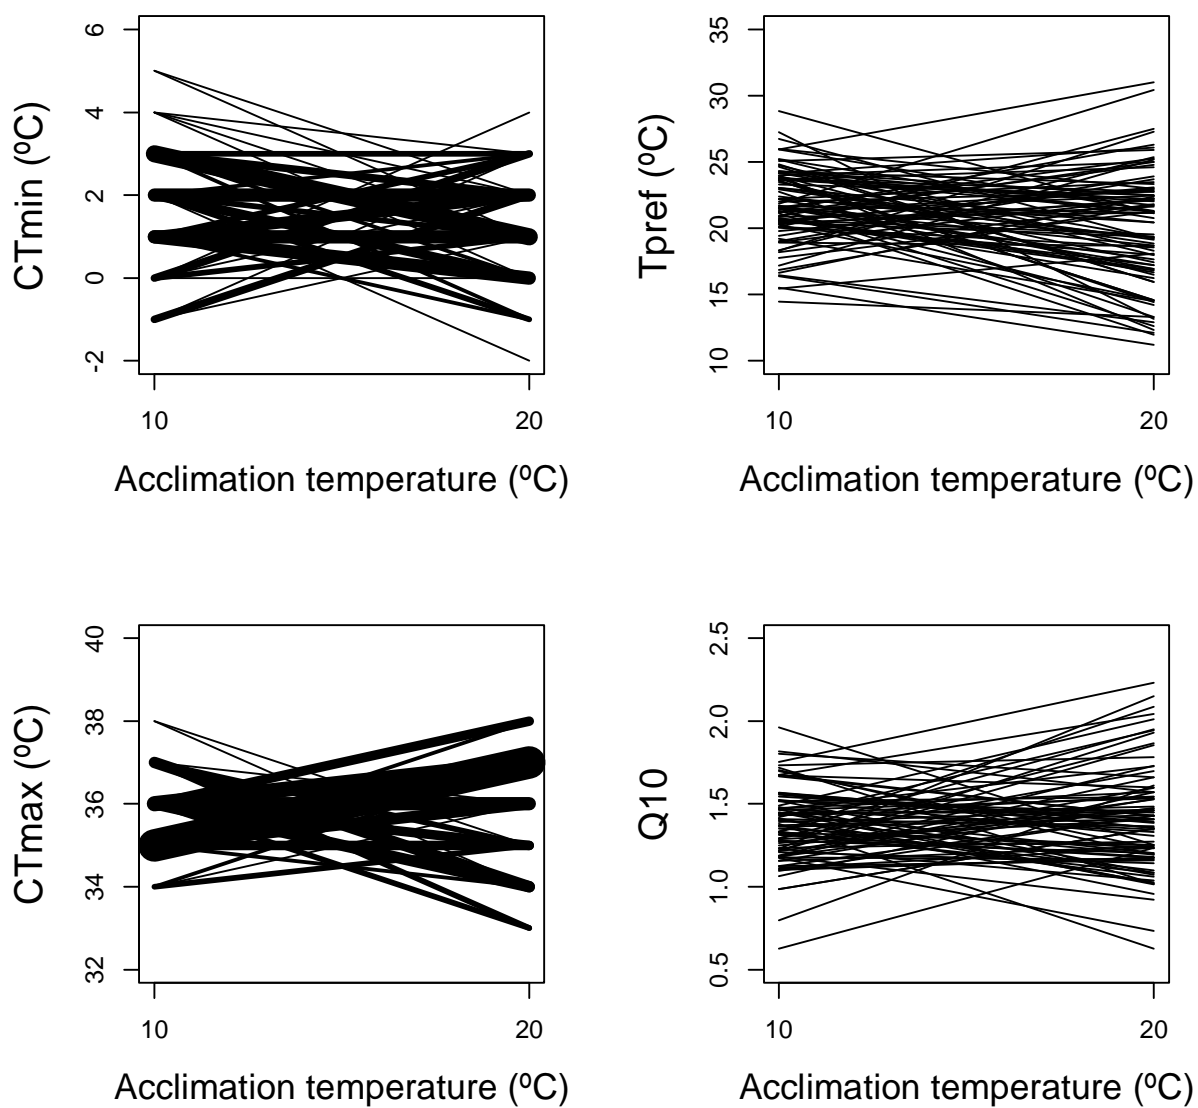

454

455

456 **Figure 3**

457

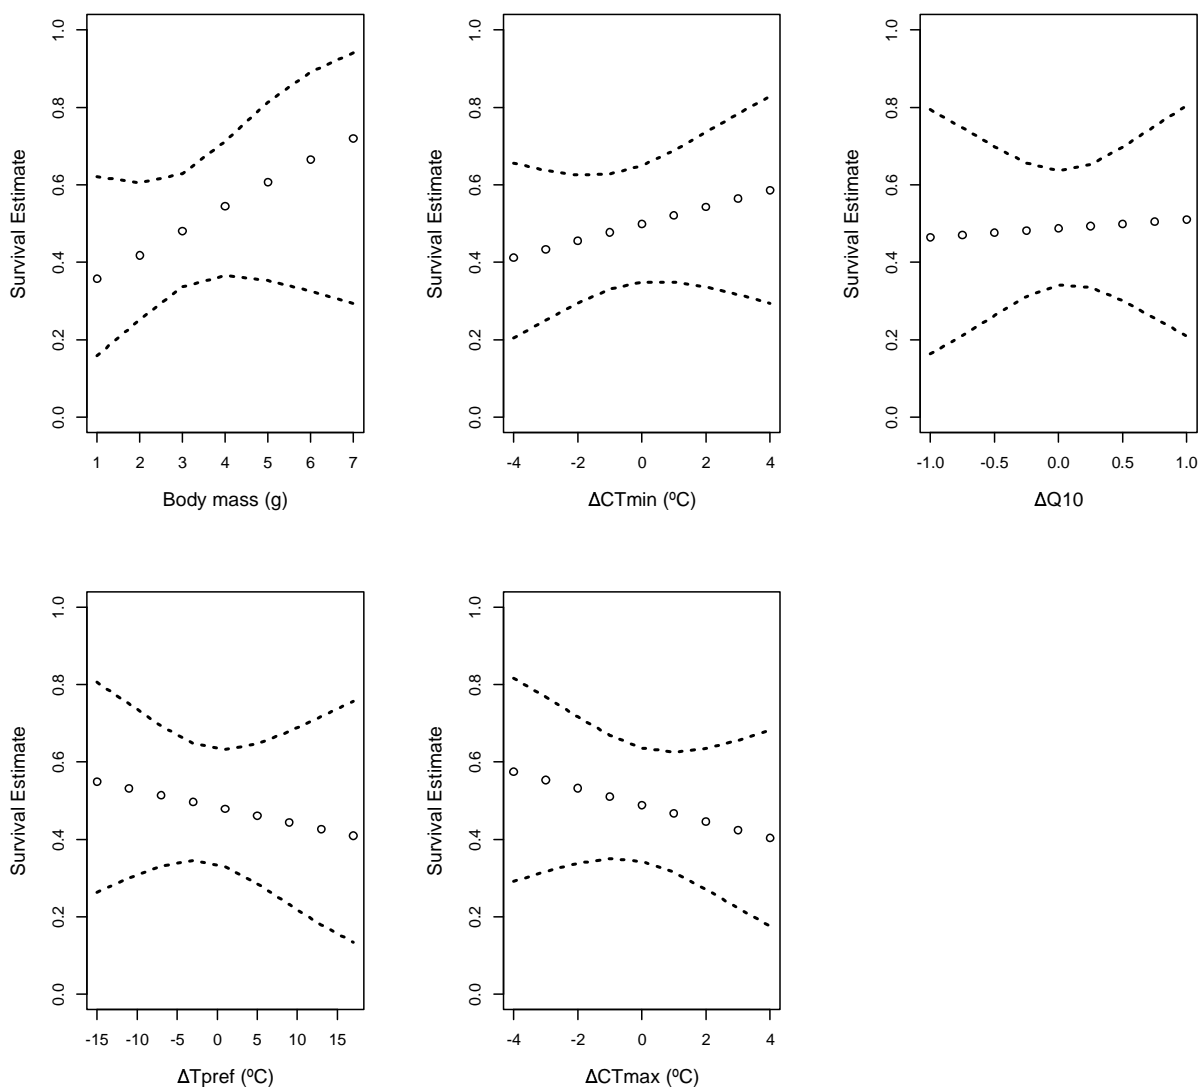

458

459 **Table 1.** Candidate models ordered accordingly to their Akaike weights. Single term models  
 460 represent directional (e.g.  $\Delta CT_{Max}$ ) and/or stabilizing selection when a square term is included  
 461 (e.g.  $\Delta CT_{Max} + (\Delta CT_{Max})^2$ ) and correlational selection when different traits plasticity are  
 462 included (e.g.  $\Delta CT_{Max} * \Delta CT_{Min}$ ).

| Models                                                                                                                                                         | K  | AICc   | $\Delta AICc$ | $w_i$ |
|----------------------------------------------------------------------------------------------------------------------------------------------------------------|----|--------|---------------|-------|
| 1 Null model                                                                                                                                                   | 2  | 106.28 | 0.00          | 0.41  |
| 2 MB                                                                                                                                                           | 3  | 107.98 | 1.70          | 0.17  |
| 3 $\Delta CT_{Min}$                                                                                                                                            | 4  | 109.89 | 3.61          | 0.07  |
| 4 $\Delta CT_{Max}$                                                                                                                                            | 4  | 109.93 | 3.65          | 0.07  |
| 5 $\Delta T_{Pref}$                                                                                                                                            | 4  | 110.02 | 3.74          | 0.06  |
| 6 $\Delta Q_{10}$                                                                                                                                              | 4  | 110.09 | 3.81          | 0.06  |
| 7 $\Delta CT_{Min} + (\Delta CT_{Min})^2$                                                                                                                      | 5  | 112.04 | 5.76          | 0.02  |
| 8 $\Delta CT_{Max} + (\Delta CT_{Max})^2$                                                                                                                      | 5  | 112.08 | 5.80          | 0.02  |
| 9 $\Delta T_{Pref} + (\Delta T_{Pref})^2$                                                                                                                      | 5  | 112.17 | 5.89          | 0.02  |
| 10 $\Delta Q_{10} + (\Delta Q_{10})^2$                                                                                                                         | 5  | 112.24 | 5.96          | 0.02  |
| 11 $\Delta CT_{Max} * \Delta CT_{Min}$                                                                                                                         | 6  | 113.14 | 6.86          | 0.01  |
| 12 $\Delta CT_{Max} * \Delta T_{Pref}$                                                                                                                         | 6  | 113.21 | 6.93          | 0.01  |
| 13 $\Delta CT_{Max} * \Delta Q_{10}$                                                                                                                           | 6  | 113.89 | 7.61          | 0.01  |
| 14 $\Delta CT_{Min} * \Delta T_{Pref}$                                                                                                                         | 6  | 114.16 | 7.88          | 0.01  |
| 15 $\Delta CT_{Min} * \Delta Q_{10}$                                                                                                                           | 6  | 114.21 | 7.93          | 0.01  |
| 16 $\Delta Q_{10} * \Delta T_{Pref}$                                                                                                                           | 6  | 114.26 | 7.98          | 0.01  |
| 17 $\Delta CT_{Max} + (\Delta CT_{Max})^2 + \Delta CT_{Min} + (\Delta CT_{Min})^2$                                                                             | 7  | 115.88 | 9.60          | 0.00  |
| 18 $\Delta CT_{Max} + (\Delta CT_{Max})^2 + \Delta T_{Pref} + (\Delta T_{Pref})^2$                                                                             | 7  | 116.37 | 10.09         | 0.00  |
| 19 $\Delta CT_{Min} + (\Delta CT_{Min})^2 + \Delta T_{Pref} + (\Delta T_{Pref})^2$                                                                             | 7  | 116.39 | 10.11         | 0.00  |
| 20 $\Delta CT_{Min} + (\Delta CT_{Min})^2 + \Delta Q_{10} + (\Delta Q_{10})^2$                                                                                 | 7  | 116.43 | 10.15         | 0.00  |
| 21 $\Delta CT_{Max} + (\Delta CT_{Max})^2 + \Delta Q_{10} + (\Delta Q_{10})^2$                                                                                 | 7  | 116.44 | 10.16         | 0.00  |
| 22 $\Delta Q_{10} + (\Delta Q_{10})^2 + \Delta T_{Pref} + (\Delta T_{Pref})^2$                                                                                 | 7  | 116.55 | 10.27         | 0.00  |
| 23 $\Delta CT_{Max} + (\Delta CT_{Max})^2 + \Delta CT_{Min} + (\Delta CT_{Min})^2 + \Delta Q_{10} + (\Delta Q_{10})^2$                                         | 9  | 120.32 | 14.04         | 0.00  |
| 24 $\Delta CT_{Max} + (\Delta CT_{Max})^2 + \Delta CT_{Min} + (\Delta CT_{Min})^2 + \Delta T_{Pref} + (\Delta T_{Pref})^2$                                     | 9  | 120.34 | 14.06         | 0.00  |
| 25 $\Delta CT_{Max} + (\Delta CT_{Max})^2 + \Delta T_{Pref} + (\Delta T_{Pref})^2 + \Delta Q_{10} + (\Delta Q_{10})^2$                                         | 9  | 120.83 | 14.55         | 0.00  |
| 26 $\Delta CT_{Min} + (\Delta CT_{Min})^2 + \Delta T_{Pref} + (\Delta T_{Pref})^2 + \Delta Q_{10} + (\Delta Q_{10})^2$                                         | 9  | 120.90 | 14.62         | 0.00  |
| 27 $\Delta CT_{Max} + (\Delta CT_{Max})^2 + \Delta CT_{Min} + (\Delta CT_{Min})^2 + \Delta Q_{10} + (\Delta Q_{10})^2 + \Delta T_{Pref} + (\Delta T_{Pref})^2$ | 11 | 124.87 | 18.59         | 0.00  |

463 Note: MB was included in all 3 – 27 models



- 464  $K$  = number of parameters.  
465 AICc: AIC values corrected for small sample sizes.  
466  $w_i$ : Akaike weights.

## Acclimation 10°C

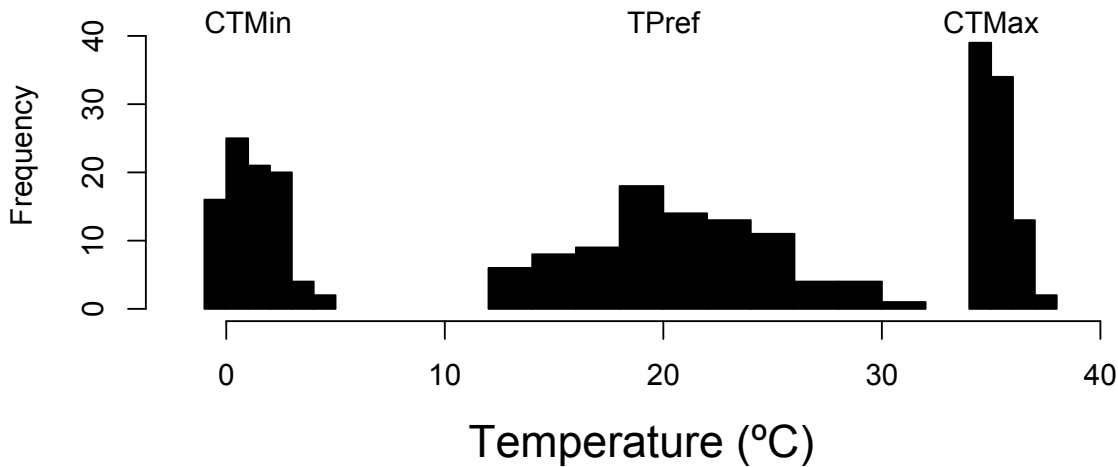

## Acclimation 20°C

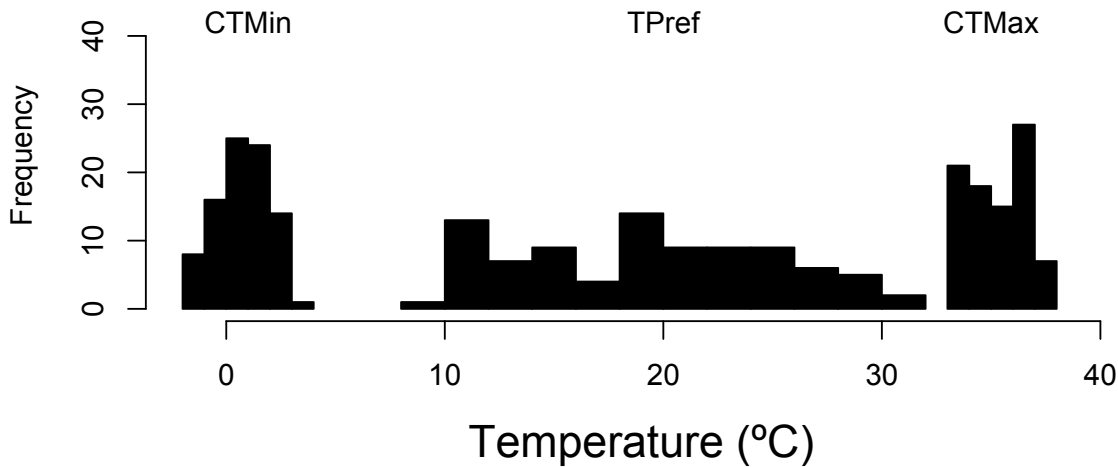

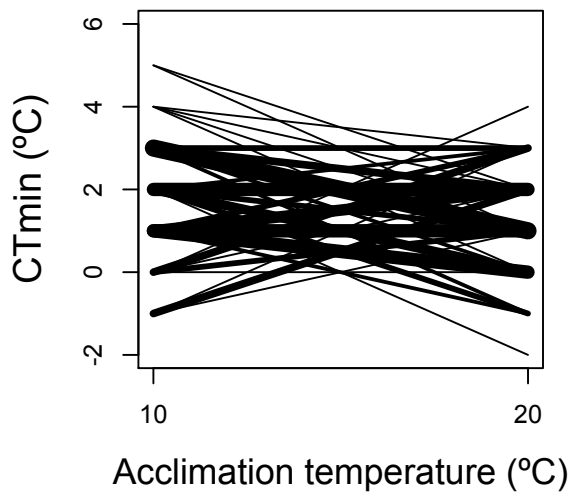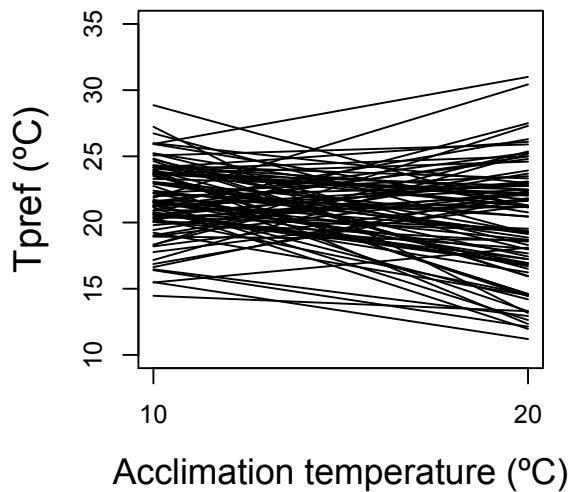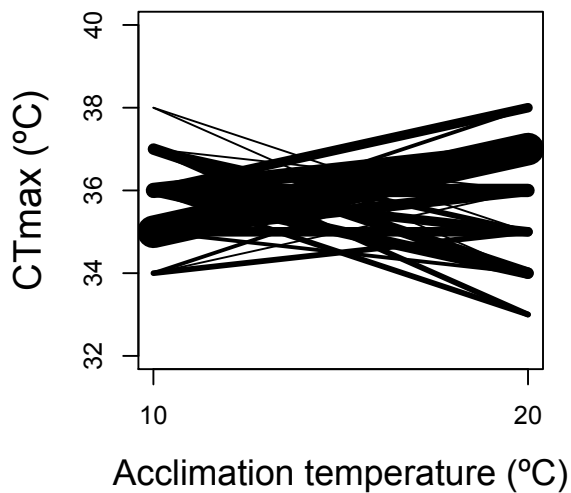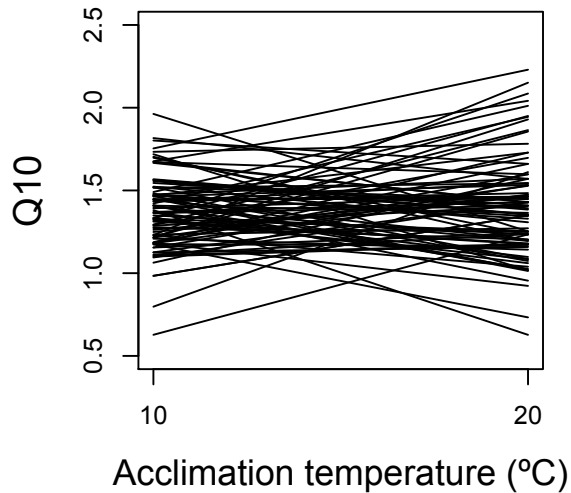

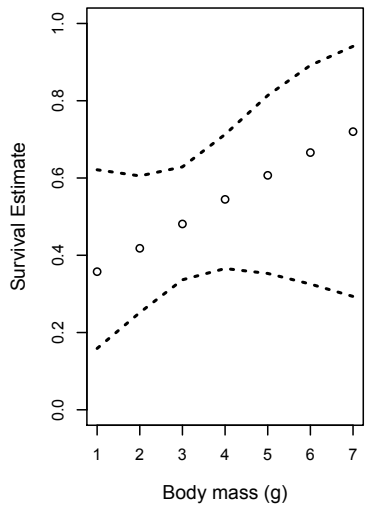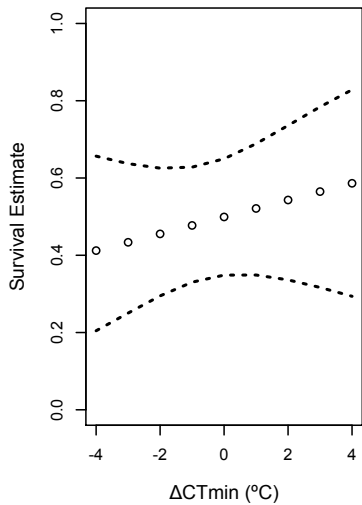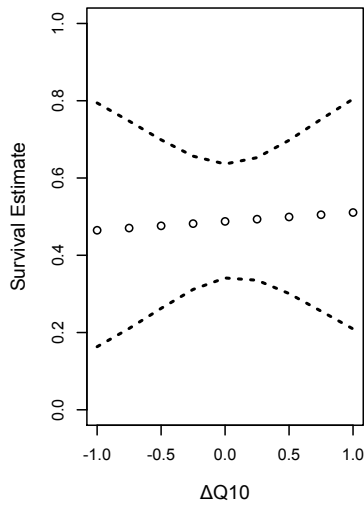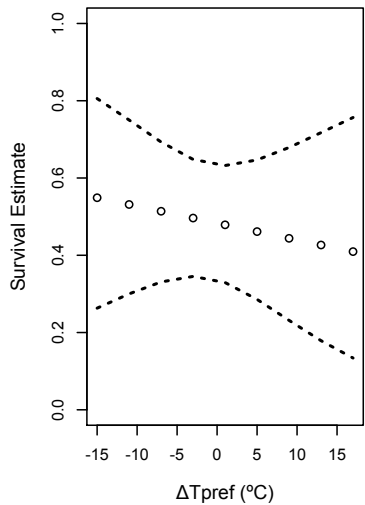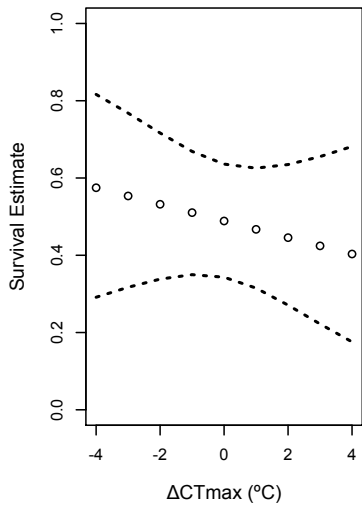

Source: http://biorxiv.org/content/10.1101/191825v1.full.pdf
